# Supplementary material for: Trial to assess the tolerability of using felodipine to upregulate autophagy as a treatment of Huntington’s disease (FELL-HD): a phase II, single-centre, open-label, dose-finding trial protocol
Source: PubMed Central journal article supplement (PMC11340714; doi:10.1136/bmjopen-2024-087983), 2024-08-21
Supplement: bmjopen-2024-087983.reviewer_comments.pdf [file bmjopen-2024-087983.reviewer_comments.pdf]

## PEER REVIEW HISTORY

BMJ Open publishes all reviews undertaken for accepted manuscripts. Reviewers are asked to complete a checklist review form (<http://bmjopen.bmj.com/site/about/resources/checklist.pdf>) and are provided with free text boxes to elaborate on their assessment. These free text comments are reproduced below.

## ARTICLE DETAILS

|                            |                                                                                                                                                                                                                     |
|----------------------------|---------------------------------------------------------------------------------------------------------------------------------------------------------------------------------------------------------------------|
| <b>TITLE (PROVISIONAL)</b> | A trial to assess the tolerability of using felodipine to upregulate autophagy as a treatment of Huntington's disease (FELL-HD): a Phase II, single centre, open label, dose finding trial protocol                 |
| <b>AUTHORS</b>             | Andresen, Katie; Cutting, Emma; Apostolopoulos, Dimitrios; Evans, Amy H; Oakley, Laura; Dayimu, Alimu; Demiris, Nikolaos; Bongaerts, Katherine; Staples, Robyn; Gooding, Wendy; Rubinsztein, David; Barker, Roger A |

This article was not externally reviewed at BMJ Open. Protocols that have been independently assessed prior to submission to BMJ Open are usually fast-tracked to publication on the grounds that further substantial changes will not be possible. This independent assessment will usually be external, independent review for both a substantial grant award from a non-commercial or government funder and ethics approval.
